# Supplementary material
Source: Springer Nature journal article supplement (https://www.springermedizin.de/resource/supplementary/13048_2014_283_MOESM4_ESM.pdf/9665306)

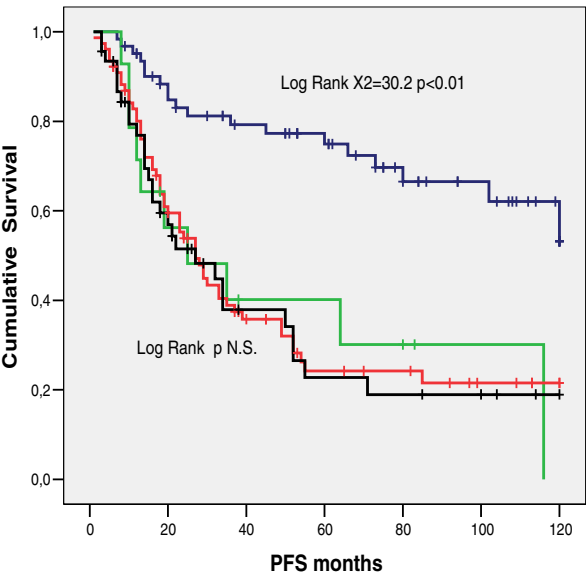

**A**

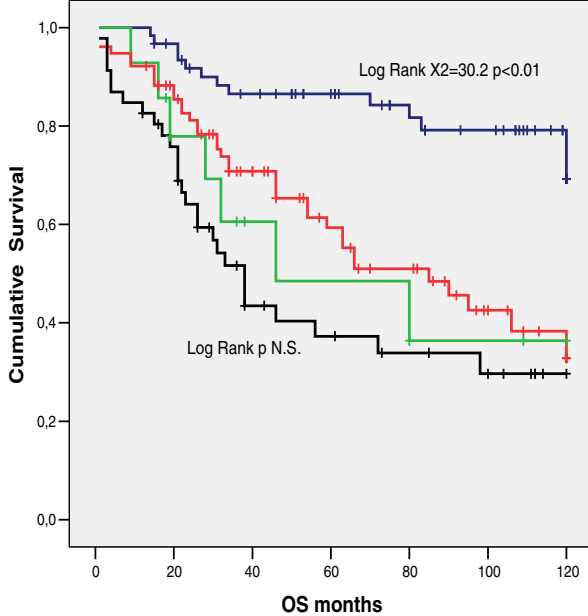

**B**

Supplement: MOESM4 [file 9665306]
